# Supplementary material
Source: PubMed Central journal article supplement (PMC3596004)
Supplement: NIHMS423404-supplement-supplement_1.pdf [file NIHMS423404-supplement-supplement_1.pdf]

**Supplementary Table 1.** Risk Factors for CCA

---

Cirrhosis  
 Cystic disorders  
     Caroli's disease  
     Choledochal cysts  
 Biliary-enteric drainage  
 Hepatitis B  
 Hepatitis C  
 Hepatobiliary flukes  
     *Clonorchis sinensis*  
     *O viverrini*  
 Hepatolithiasis  
 PSC  
 Thorotrast exposure

---

**Supplementary Table 2.** Histologic Types of iCCA

---

Bile duct type  
     Small bile duct type  
         Well differentiated  
         Moderately differentiated  
         Poorly differentiated  
     Large bile duct type  
         Well differentiated  
         Moderately differentiated  
         Poorly differentiated  
 Bile ductular type  
     Intraductal type  
         Papillary type  
         Tubular type  
         Superficial spreading type  
 Rare variants  
     Squamous/adenosquamous type  
     Mucinous/signet cell type  
     Clear cell type  
     Undifferentiated type  
     Lymphoepithelial type  
     Others

---

NOTE. Adapted with permission from Nakanuma et al.<sup>11</sup>
